# Supplementary material for: Synthesis of Ag nanoparticles decorated MnO2/sulfonated graphene composites with 3D macroporous structure for high performance capacitors electrode materials
Source: Royal Society of Chemistry journal article supplement (doi:10.1039/c6ra19431a), 2016-01-01
Supplement: c6ra19431a1.pdf [file c6ra19431a1.pdf]

**Electronic Supplementary Material (ESI) for RSC Advances**

## Electronic Supplementary Information

---

**Synthesis of Ag nanoparticles decorated MnO<sub>2</sub> / Sulfonated  
Graphene Composites with 3D Macroporous Structure for High  
Performance Capacitors Electrode Material**

Li Liu<sup>a</sup>, Jie Zhao<sup>b,c</sup>, Wei-Hua Li<sup>\*,b,d</sup>, Xiao-Ying Zhang<sup>b</sup>, Hui-Zhong Xu<sup>a</sup>, Kai-Li<sup>a</sup>, Yan Kai<sup>a</sup>, Li-Shui Sun<sup>a</sup>,  
Chao-Qin Li<sup>a</sup>, and Fa-Qian Liu<sup>\*,a</sup>

Electronic Supplementary Material (ESI) for RCS Advances

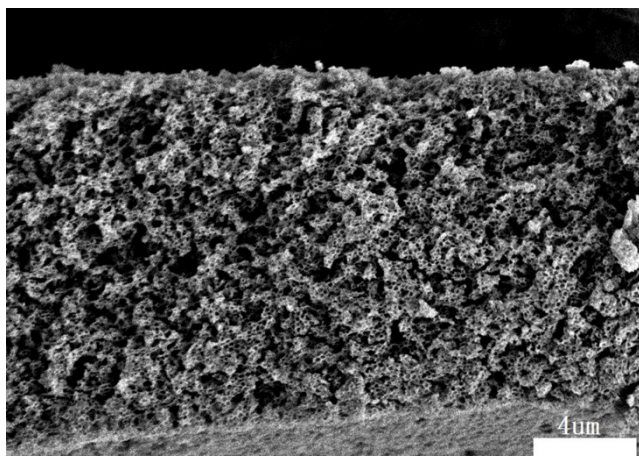

**Fig.S1** Cross-sectional SEM images of the obtained 3D SG structure..

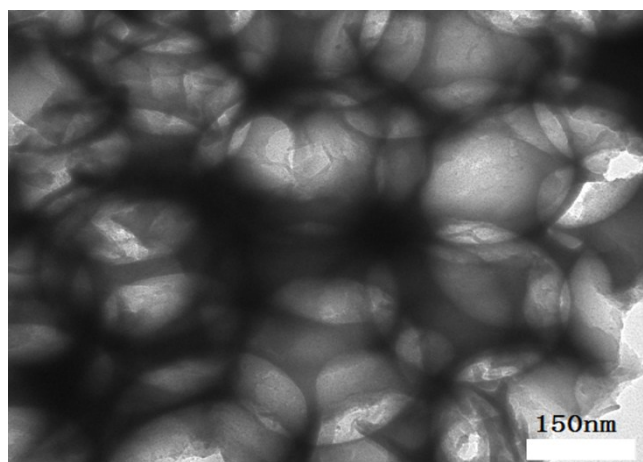

**Fig.S2** The TEM image of the obtained 3D SG structure

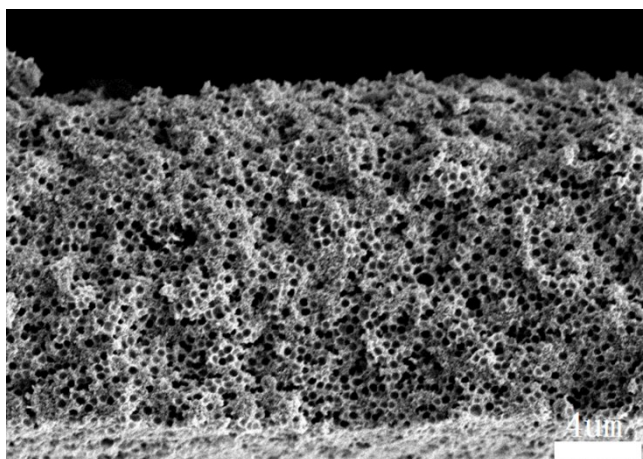

**Fig. S3** Cross-sectional SEM images of the obtained 3D MnO<sub>2</sub>/ SG structure.

## Electronic Supplementary Material (ESI) for RCS Advances

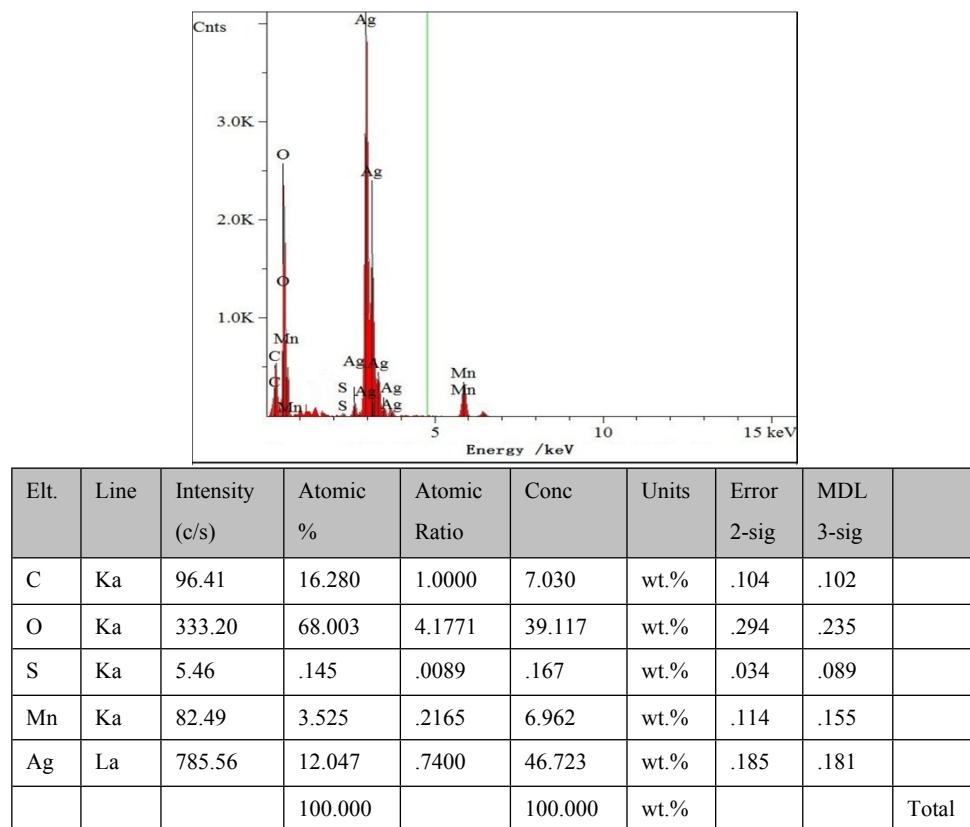

**Fig. S4** Energy-dispersive X-ray spectroscopy (EDS) spectrum results of the 3D Ag-MnO<sub>2</sub>/SG. The table below the figure is the analysis results of element content according to the EDS.

Electronic Supplementary Material (ESI) for RCS Advances

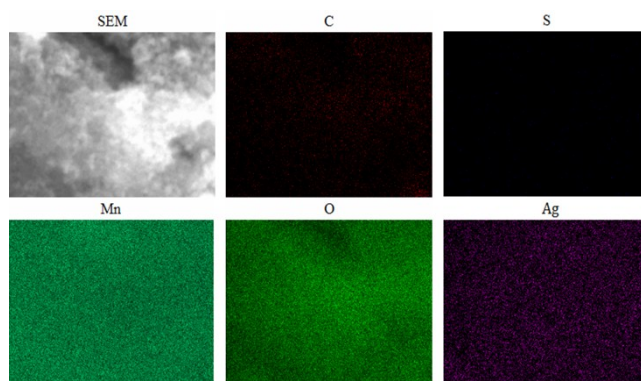

**Fig. S5** The EDS elemental mapping of C, S, Mn, O and Ag for the 3D  
Ag-MnO<sub>2</sub>/ SG.
